# Supplementary material
Source: Elsevier journal article supplement (https://www.sciencedirect.com/science/article/pii/S1885585722000299)

**Barrero A. Temporal trend and potential impact of angiotensin receptor neprilysin inhibitors on transcatheter edge-to-edge mitral valve repair. Rev Esp Cardiol. 2022**

**SUPPLEMENTARY DATA**

**Table 1 of the supplementary data.** Baseline characteristics in the ARNI era by ARNI prescription

|                                   | Treated with ARNI (n = 52) | Not treated with ARNI (n = 587) | P     |
|-----------------------------------|----------------------------|---------------------------------|-------|
| Female sex                        | 11 (21.2)                  | 196 (33.4)                      | .071  |
| Age, y                            | 73 [65.0-79.5]             | 76 [69.8-82.0]                  | .037* |
| BMI, kg/m <sup>2</sup>            | 26 [23.7-28.9]             | 26 [24.0-29.4]                  | .311  |
| Diabetes                          | 23 (44.2)                  | 195 (34.0)                      | .140  |
| Diabetes on insulin               | 5 (19.2)                   | 69 (28.4)                       | .320  |
| Hypertension                      | 35 (67.3)                  | 436 (76.2)                      | .152  |
| Dyslipidemia                      | 25 (49.0)                  | 338 (59.0)                      | .167  |
| Smoker                            | 13 (25.5)                  | 184 (32.3)                      | .318  |
| Dialysis                          | 0 (0.0)                    | 17 (3.0)                        | .385  |
| NYHA III-IV                       | 46 (88.5)                  | 495 (87.6)                      | .858  |
| Ischemic heart disease            | 22 (42.3)                  | 301 (52.7)                      | .150  |
| Previous PCI                      | 17 (34.7)                  | 189 (33.2)                      | .833  |
| Previous CABG                     | 5 (9.6)                    | 83 (14.6)                       | .323  |
| Extracoronary arteriopathy        | 9 (17.3)                   | 85 (15.0)                       | .652  |
| Atrial fibrillation               | 38 (73.1)                  | 376 (65.8)                      | .291  |
| COPD                              | 15 (28.8)                  | 129 (22.7)                      | .313  |
| Previous permanent pacemaker      | 12 (23.1)                  | 70 (12.3)                       | .028* |
| Stroke                            | 7 (13.5)                   | 70 (12.3)                       | .801  |
| Prior TAVI                        | 0 (0.0)                    | 19 (3.4)                        | .394  |
| Critical preoperative state       | 5 (9.6)                    | 31 (5.5)                        | .218  |
| EuroSCORE 2, %                    | 6.6 [5.6-10.6]             | 7.1 [5.1-12.3]                  | .873  |
| STS score, %                      | 6.3 [4.2-7.8]              | 5.6 [4.1-7.8]                   | .451  |
| Urgent procedure                  | 4 (7.8)                    | 39 (7.0)                        | .775  |
| Cardiac resynchronization therapy | 11 (21.2)                  | 66 (11.6)                       | .045* |
| Frailty                           | 8 (16.0)                   | 96 (17.6)                       | .778  |
| Loop diuretics                    | 49 (98.0)                  | 503 (94.6)                      | .502  |
| MRA                               | 31 (62.0)                  | 261 (49.2)                      | .082  |
| Hydralazine + nitrates            | 3 (6.1)                    | 17 (3.4)                        | .412  |

ARNI, angiotensin receptor-neprilysin inhibitors; BMI, body mass index; CABG, coronary artery bypass graft; COPD, chronic obstructive pulmonary disease; MRA, mineralocorticoid receptor antagonist; NYHA, New York Heart Association; PCI, percutaneous coronary interventions; STS, Society of Thoracic Surgeons; TAVI, transcatheter aortic valve implantation.

Data are expressed as No. (%) or median [interquartile range].

**Barrero A. Temporal trend and potential impact of angiotensin receptor neprilysin inhibitors on transcatheter edge-to-edge mitral valve repair. Rev Esp Cardiol. 2022**

\*Significant *P* values.

**Barrero A. Temporal trend and potential impact of angiotensin receptor neprilysin inhibitors on transcatheter edge-to-edge mitral valve repair. Rev Esp Cardiol. 2022**

**Table 2 of the supplementary data.** Echocardiographic features in the ARNI era by ARNI prescription

|                                   | Treated with ARNI<br>(n = 52) | Not treated with<br>ARNI (n = 587) | P     |
|-----------------------------------|-------------------------------|------------------------------------|-------|
| <i>Preprocedural features</i>     |                               |                                    |       |
| LVEF, %                           | 34 [29.5-55.0]                | 39 [30.0-54.3]                     | .193  |
| LVEDD, mm                         | 64 [57.5-70.5]                | 60 [54.0-67.5]                     | .148  |
| LVESD, mm                         | 47 [33.0-59.0]                | 48 [37.0-58.5]                     | .820  |
| LVEDV, mL                         | 171.5 [119.0-218.0]           | 146 [105.0-187.0]                  | .060  |
| LVESV, mL                         | 100 [68.0-175.0]              | 81 [50.0-126.5]                    | .124  |
| PASP, mmHg                        | 50.5 [40.0-55.0]              | 50 [40.0-60.0]                     | .729  |
| TAPSE, mm                         | 17 [14.0-19.0]                | 17 [13.0-20.0]                     | .818  |
| Regurgitant volume, mL/beat       | 61.9 [51.0-72.5]              | 56.3 [46.0-68.0]                   | .312  |
| Vena contracta, mm                | 7 [6.5-8.0]                   | 7 [6.1-8.0]                        | .469  |
| Annulus bicomissural diameter, mm | 38 [35.0-42.0]                | 36 [33.0-40.0]                     | .201  |
| Mitral gradient, mmHg             | 1 [1.0-2.0]                   | 1 [1.0-2.0]                        | .958  |
| Flail                             | 6 (19.4)                      | 75 (20.4)                          | .892  |
| Annulus calcification             | 4 (10.8)                      | 75 (22.7)                          | .094  |
| TR grade 3-4                      | 15 (32.6)                     | 173 (36.5)                         | .600  |
| Mitral regurgitation grade 3-4    | 49 (100)                      | 525 (100.0)                        | .999  |
| LA mean pressure, mmHg            | 21.5 [16.0-24.0]              | 18 [13.0-23.0]                     | .190  |
| <i>Postprocedure features</i>     |                               |                                    |       |
| Mitral regurgitation grade 3-4    | 2 (4.1)                       | 26 (4.9)                           | .999  |
| PASP, mmHg                        | 34.5 [30.0-40.0]              | 42.5 [35.0-50.0]                   | .046* |
| Mitral gradient, mmHg             | 2.5 [2.0-3.4]                 | 3 [2.0-4.0]                        | .296  |
| LA mean pressure, mmHg            | 12 [8.0-17.0]                 | 13 [9.0-17.0]                      | .561  |

ARNI, angiotensin receptor-neprilysin inhibitors; LA, left atrial; LVEDD, left ventricular end-diastolic diameter; LVESD, left ventricular end-systolic diameter; LVESV, left ventricular end-systolic volume; LVEDV, left ventricular end-diastolic volume; PASP, pulmonary artery systolic pressure; TAPSE, tricuspid annular plane systolic excursion; TR, tricuspid regurgitation.

Data are expressed as No. (%) or median [interquartile range].

\*Significant P values.

**Barrero A. Temporal trend and potential impact of angiotensin receptor neprilysin inhibitors on transcatheter edge-to-edge mitral valve repair. Rev Esp Cardiol. 2022**

**Table 3 of the supplementary data.** Procedural, in-hospital and long-term outcomes in the ARNI era by ARNI prescription

|                                   | Treated with ARNI (n = 52) | Not treated with ARNI (n = 587) | P     |
|-----------------------------------|----------------------------|---------------------------------|-------|
| <i>Procedural outcomes</i>        |                            |                                 |       |
| Procedural success                | 46 (93.9)                  | 473 (94.6)                      | .743  |
| Technical success                 | 49 (98.0)                  | 531 (96.7)                      | .999  |
| Catheter thrombosis               | 1 (2.1)                    | 1 (0.2)                         | .158  |
| Cordal rupture                    | 1 (2.1)                    | 2 (0.4)                         | .228  |
| Cordal entrapment                 | 0 (0.0)                    | 2 (0.4)                         | .999  |
| Procedure inotropes               | 4 (8.0)                    | 39 (7.1)                        | .774  |
| Procedure IABP                    | 0 (0.0)                    | 7 (1.4)                         | .999  |
| <i>In-hospital outcomes</i>       |                            |                                 |       |
| Mortality                         | 2 (4.5)                    | 15 (3.0)                        | .638  |
| Hematoma                          | 7 (15.2)                   | 31 (5.9)                        | .026* |
| Pseudoaneurysm                    | 1 (2.1)                    | 9 (1.7)                         | .579  |
| AV fistula                        | 0 (0.0)                    | 8 (1.5)                         | .999  |
| Vascular surgery                  | 0 (0.0)                    | 2 (0.4)                         | .999  |
| BARC 3 bleeding                   | 1 (1.9)                    | 9 (1.5)                         | .546  |
| Transfusion                       | 3 (6.5)                    | 33 (6.3)                        | .999  |
| <i>Long-term outcomes</i>         |                            |                                 |       |
| Mortality at 30 d                 | 0 (0.0)                    | 11 (1.9)                        | .999  |
| Mortality at 1 y                  | 3 (5.8)                    | 51 (8.7)                        | .609  |
| Mortality at 2 y                  | 3 (5.8)                    | 65 (11.1)                       | .235  |
| NYHA III-IV at 2 y                | 4 (15.4)                   | 113 (32.3)                      | .073  |
| HF readmission at 2 y             | 5 (9.6)                    | 101 (17.2)                      | .158  |
| Mitral regurgitation 3-4          | 1 (1.9)                    | 44 (14.3)                       | .011* |
| Mortality + HF readmission at 2 y | 6 (11.5)                   | 132 (22.5)                      | .066  |

ARNI, angiotensin receptor-neprilysin inhibitors; AV, arteriovenous; BARC, Bleeding Academic Research Consortium; HF, heart failure; IABP, intra-aortic balloon pump; HF, heart failure; NYHA, New York Heart Association.

Data are expressed as No. (%)

\*Significant P-values.

**Barrero A. Temporal trend and potential impact of angiotensin receptor neprilysin inhibitors on transcatheter edge-to-edge mitral valve repair. Rev Esp Cardiol. 2022**

**Figure 1 of the supplementary data.** Changes in the degree of mitral regurgitation from baseline to 2 years of follow-up according to the use of the edge-to-edge technique before and after the availability of ARNIs. ARNI, angiotensin receptor-neprilysin inhibitors.

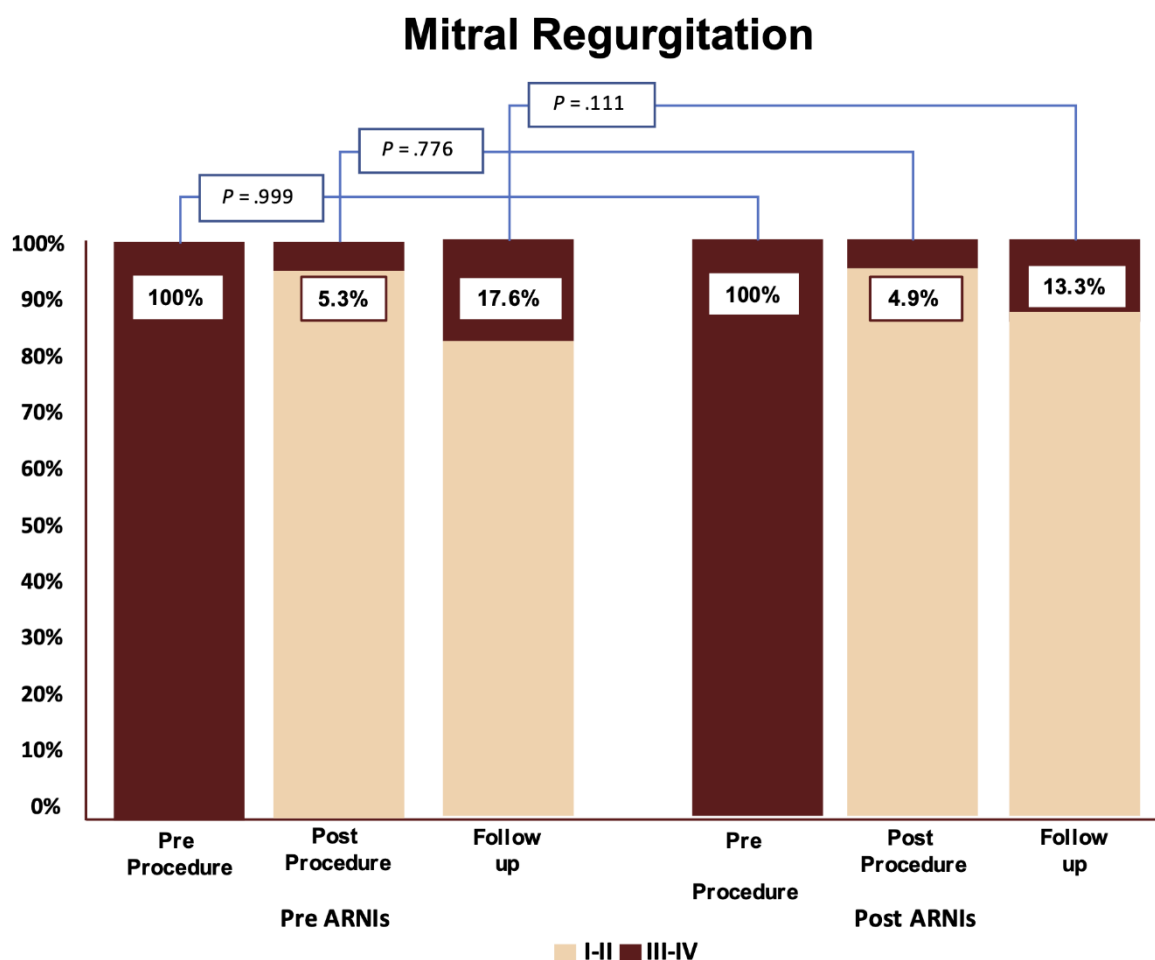

**Barrero A. Temporal trend and potential impact of angiotensin receptor neprilysin inhibitors on transcatheter edge-to-edge mitral valve repair. Rev Esp Cardiol. 2022**

**Figure 2 of the supplementary data.** Combined endpoint of death and heart failure readmission at 2 years of follow-up (A) and each component (B: death; C: heart failure readmission) in patients undergoing edge-to-edge therapy once ARNIs were available, according to their prescription. ARNIs, angiotensin receptor-neprilysin inhibitors.

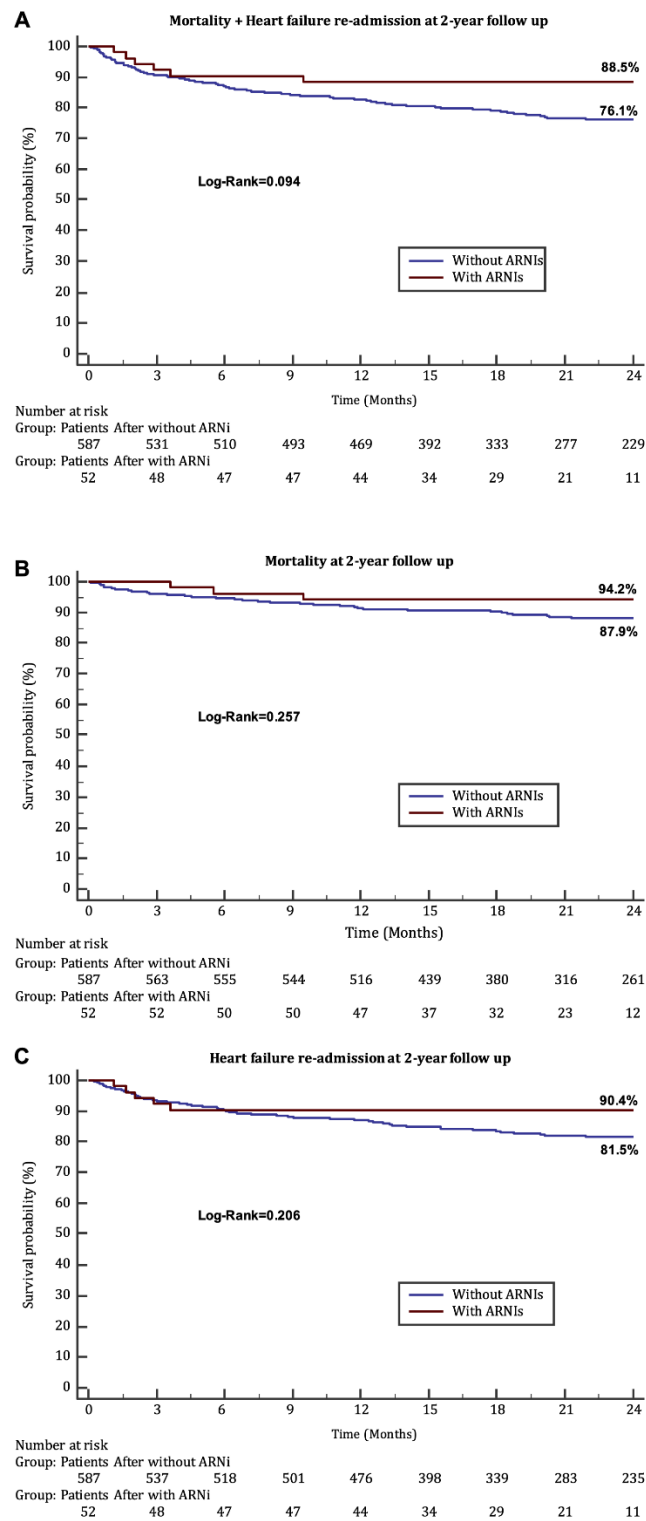

Supplement: mmc1 [file S1885585722000299:mmc1.pdf]
